# Supplementary material
Source: publisher figshare collection journal article supplement (https://acs.figshare.com/ndownloader/files/22666163)
Supplement: Supplementary file 1 [file 22666163]

## Highly efficient cell membrane tracker based on solvatochromic dye with near infrared emission

Huijie Liu, ‡ Hongyi Zhang, ‡ Jiajie Luo, Junli Peng, Baoshuai An, Zhen Qiao, Ningning Wei, \* and Yanru Zhang,\* Wei Zhu

Department of Pharmacology and Medicinal Chemistry, Qingdao University School of Pharmacy, Qingdao 266021, China

‡ These authors contributed equally

\* Correspondence: Ningning Wei (weiningning@qdu.edu.cn)

Yanru Zhang (yanru.zhang@qdu.edu.cn)

### Contents

|                |    |
|----------------|----|
| Figure S1..... | S2 |
| Figure S2..... | S2 |
| Figure S3..... | S3 |
| Video S1.....  | S3 |

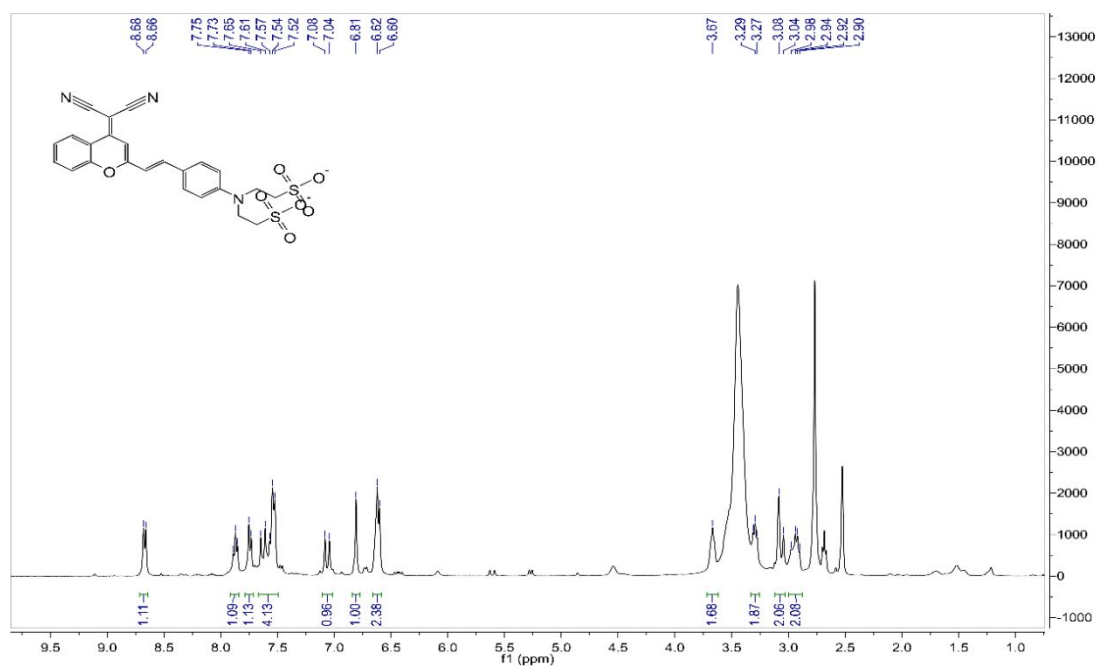

Figure S1.  $^1\text{H}$  NMR (500 MHz) spectrum of MRL in  $d_6$ -DMSO.

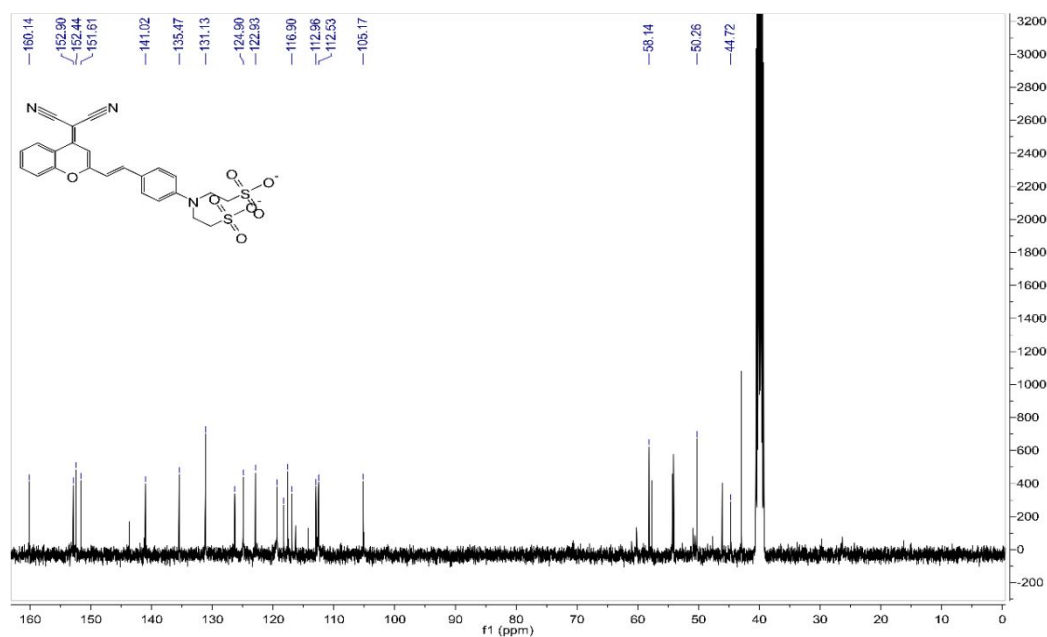

Figure S2.  $^{13}\text{C}$  NMR (125 MHz) spectrum of MRL in  $d_6$ -DMSO.

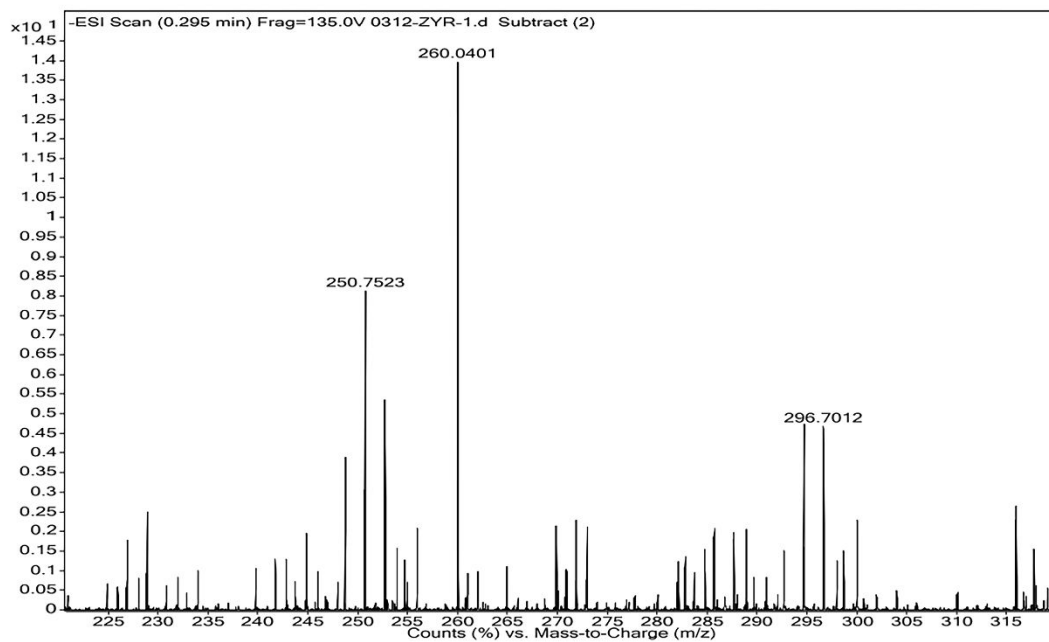

Figure S3. -ESI-MS of MRL.

Video S1. Process of digesting cells that labeled by MRL
